# Supplementary material for: Identification of Novel Broad-Spectrum Leaf Rust Resistance Sources from Khapli Wheat Landraces
Source: MDPI journal article supplement (doi:10.3390/plants11151965), 2022-07-28
Supplement: s1 [file s1]

**Table S1.** Binomial designation and avirulence/virulence formula of pathotypes of leaf rust (*P. trit-icina*) used in the study.

| S. No. | Pathotypes Designation |          | Avirulence/ Virulence formula                                   |
|--------|------------------------|----------|-----------------------------------------------------------------|
|        | Old                    | New      |                                                                 |
| 1.     | 12-3                   | 49R37    | <i>Lr1,2a, 9,10,13,18,19,20,23,24,28 / Lr2c,3a,14a,15,17,26</i> |
| 2.     | 12-4                   | 69R13    | <i>Lr1,2a, 9,13,15,17,19,23,24,26,28 / Lr2c,3a,10,14a,18,20</i> |
| 3.     | 12-5                   | 29R45    | <i>Lr1,2a, 9,10,15,19,23,24,28 / Lr2c,3a,13,14a,17,18,20,26</i> |
| 4.     | 12-9                   | 93R37    | <i>Lr1,2a, 9,15,19,20,23,24,28 / Lr2c,3a,10,13,14a,17,18,26</i> |
| 5.     | 77-1                   | 109R63   | <i>Lr9,17,19,23,24,28 / Lr1,2a,2c,3a,10,13,14a,15,18,20,26</i>  |
| 6.     | 77-2                   | 109R31-1 | <i>Lr9,17,19,24,26,28 / Lr1,2a,2c,3a,10,13,14a,15,18,20,23</i>  |
| 7.     | 77-3                   | 125R55   | <i>Lr9,19,20,23,24,28 / Lr1,2a,2c,3a,10,13,14a,15,17,18,26</i>  |
| 8.     | 77-4                   | 125R23-1 | <i>Lr9,19,20,24,26,28 / Lr1,2a,2c,3a,10,13,14a,15,17,18,23</i>  |
| 9.     | 77-5                   | 121R63-1 | <i>Lr9,18,19,24,28 / Lr1,2a,2c,3a,10,13,14a,15,17,20,23,26</i>  |
| 10.    | 77-6                   | 121R55-1 | <i>Lr9,18,19,20,24,28 / Lr1,2a,2c,3a,10,13,14a,15,17,23,26</i>  |
| 11.    | 77-9                   | 121R60-1 | <i>Lr2a,2c,9,18,19,24,28 / Lr1,3a,10,13,14a,15,17,20,23,26</i>  |
| 12.    | 77-10                  | 377R60-1 | <i>Lr2a,2c, 9,18,19,24/ Lr1,3a,10,13,14a,15,17,20,23,26,28</i>  |
| 13.    | 77A-1                  | 109R23   | <i>Lr9,17,19,20,23,24,26,28 / Lr1,2a,2c,3a,10,13,14a,15,18</i>  |
| 14.    | 104                    | 17R23    | <i>Lr9,10,13,15,18,19,20,23,24,26,28 / Lr1,2a,2c,3a,14a,17</i>  |
| 15.    | 104-2                  | 21R55    | <i>Lr9,10,13,15,19,20,23,24,28 / Lr1,2a,2c,3a,14a,17,18,26</i>  |
| 16.    | 107-1                  | 45R35    | <i>Lr1,3a,9,10,17,19,20,23,24,28 / Lr2a,2c,13,14a,15,18,26</i>  |
| 17.    | 108                    | 13R27    | <i>Lr3a,9,10,15,17,19,23,24,26,28 / Lr1,2a,2c,13,14a,18,20</i>  |
| 18.    | 162                    | 93R7     | <i>Lr1,9,15,19,20,23,24,26,28 / Lr2a,2c,3a,10,13,14a,17,18</i>  |
| 19.    | 162-1                  | 93R47    | <i>Lr1,9,15,19,23,24,28 / Lr2a,2c,3a,10,13,14a,17,18,20,26</i>  |
